# Supplementary material
Source: publisher figshare collection journal article supplement (https://acs.figshare.com/ndownloader/files/18037385)
Supplement: Supplementary file 1 [file 18037385]

Supplementary data for:

**Improved hBN single crystal growth by adding carbon in the  
metal flux**

Si-Yuan ZHANG, Kang XU, Xiao-Kang ZHAO, Zhi-Yong SHAO, Neng WAN\*

SEU-FEI Nano Pico center, Key Laboratory of MEMS of Ministry of Education,  
School of Electronics Science and Engineering, Southeast University, 210096  
Nanjing, People's Republic of China

This data includes:

EDS mapping images of the alloy ingot section at the carbon ratio of 0% (Fig. s1) and 1.8% (Fig. s2). The corresponding discussion is in the paper (page 10, paragraph 5).

\*Correspondence: [wn@seu.edu.cn](mailto:wn@seu.edu.cn)

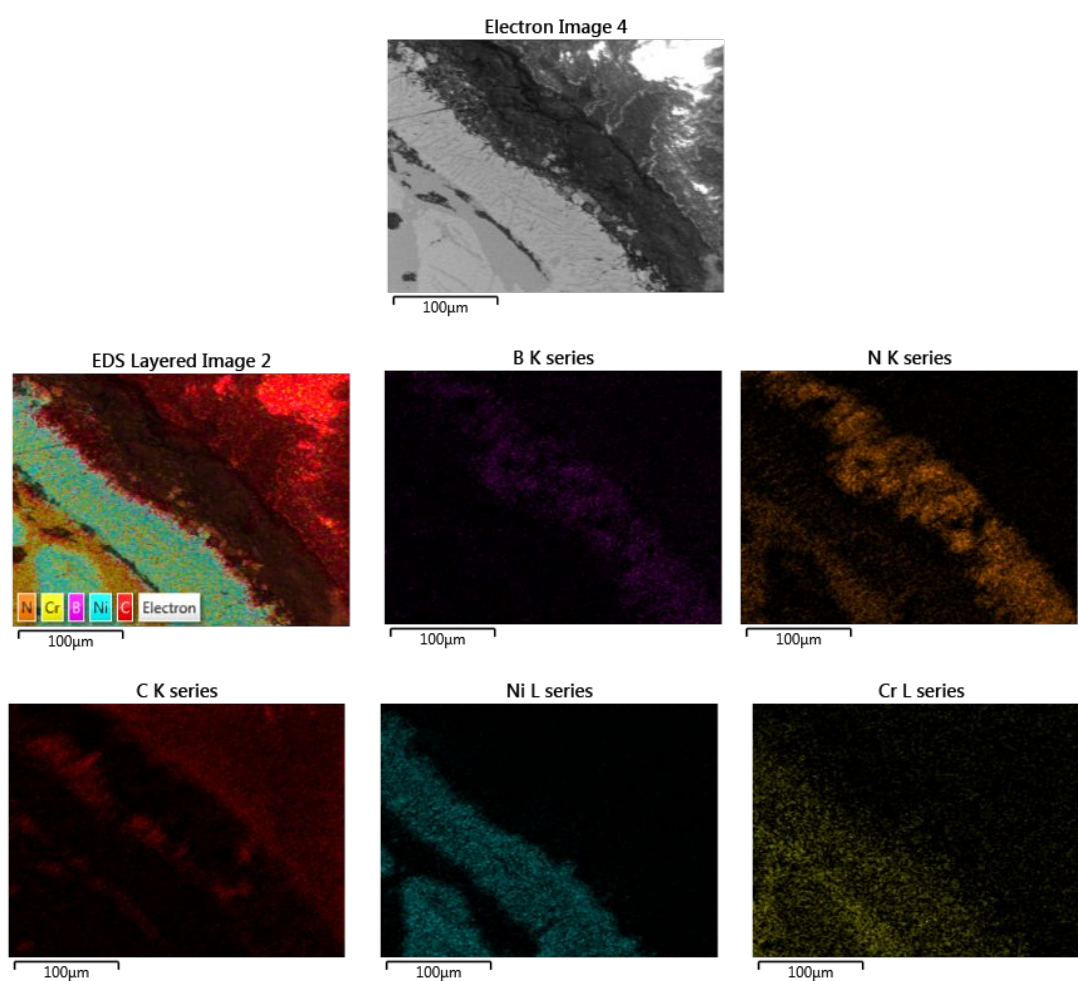

Figure s1. EDS mapping images of the alloy ingot cross-section at the carbon ratio of 0%. Carbon signal at the interface comes from the polymer that used for embedding.

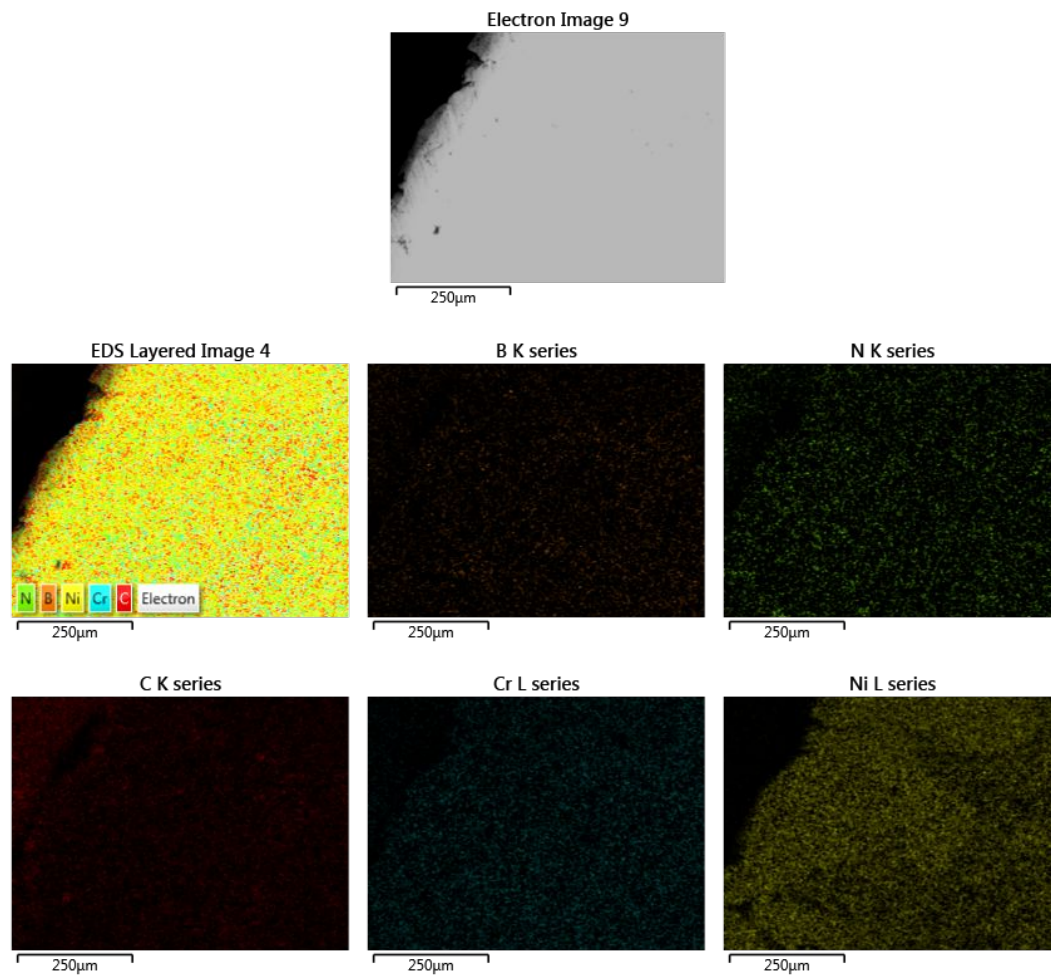

Figure s2. EDS mapping images of the alloy ingot section at the carbon ratio of 1.8%.
